# Supplementary material for: MolNetEnhancer: Enhanced Molecular Networks by Integrating Metabolome Mining and Annotation Tools
Source: MDPI journal article supplement (doi:10.3390/metabo9070144), 2019-07-16

**(a)**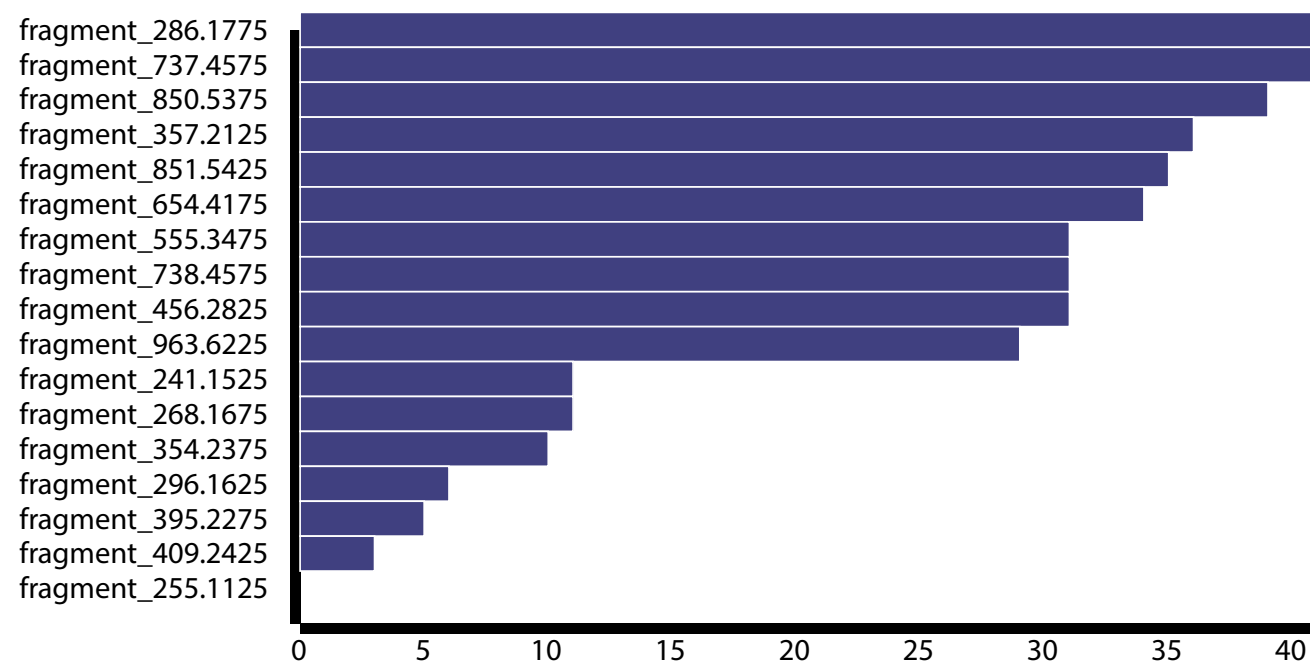**(b)**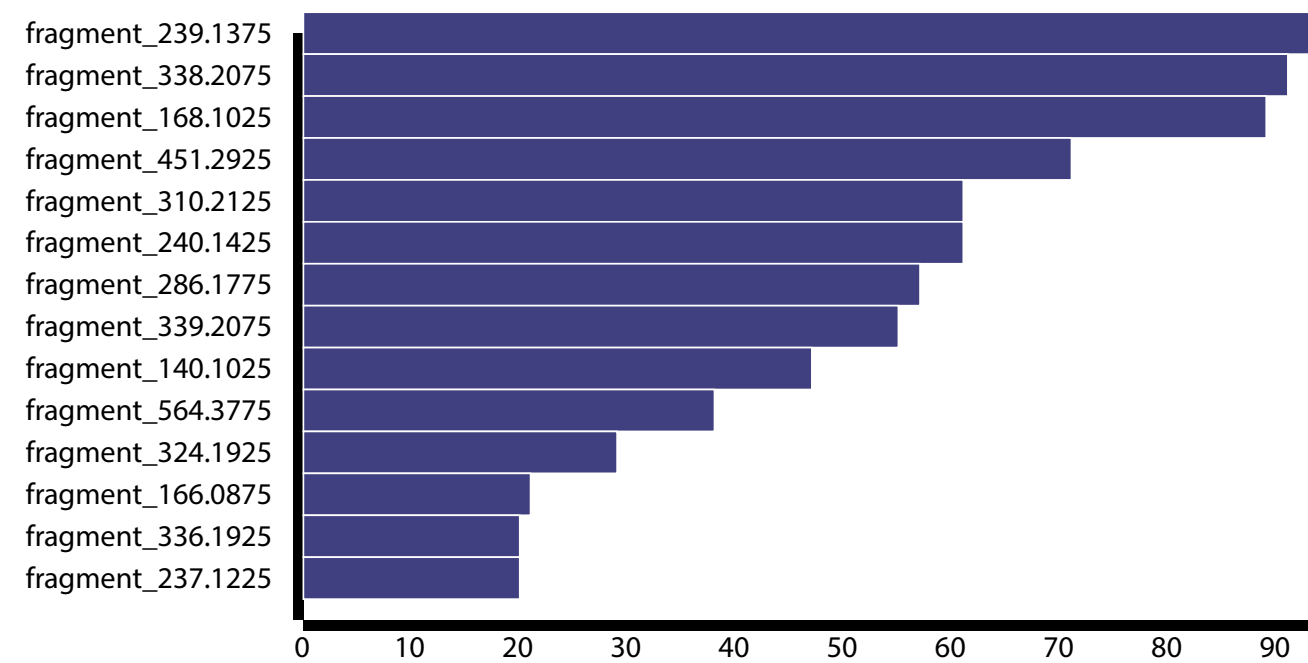**(c)**Cluster index **9434**    Modification: **C3H5NO + 78.986 Da = 150.023 Da**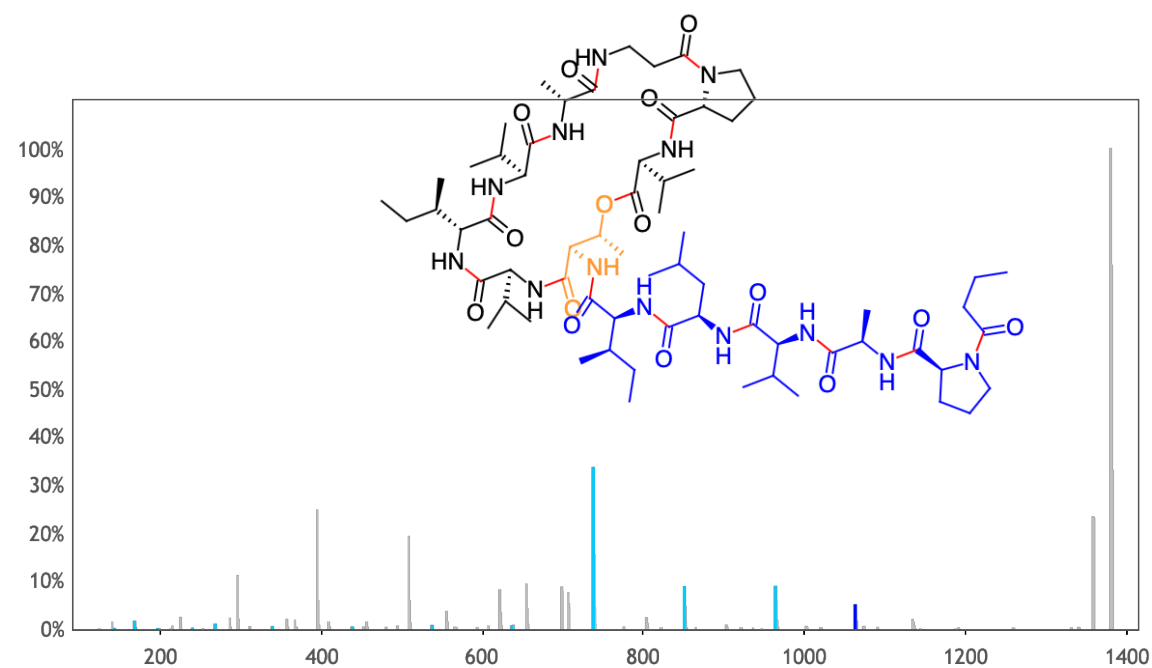**(d)**Cluster index **7530**    Modification: **C5H7NO - 97.053 Da = 0.000 Da**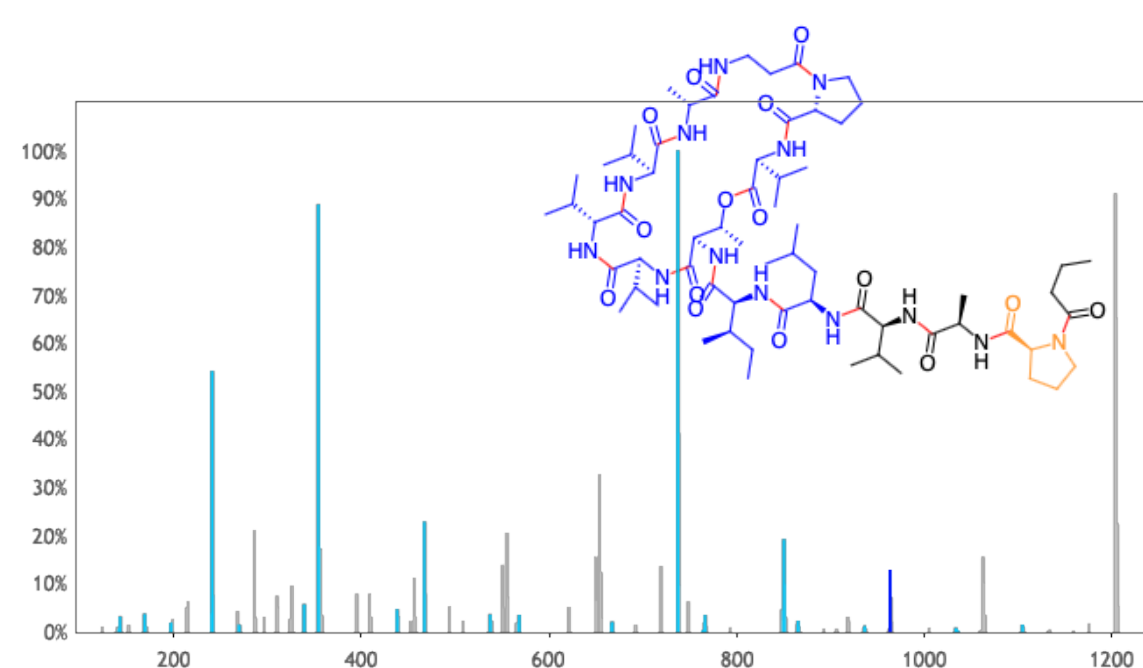**(e)**Cluster index **9404**    Modification: **C4H6NO2 + 35.979 Da = 136.019 Da**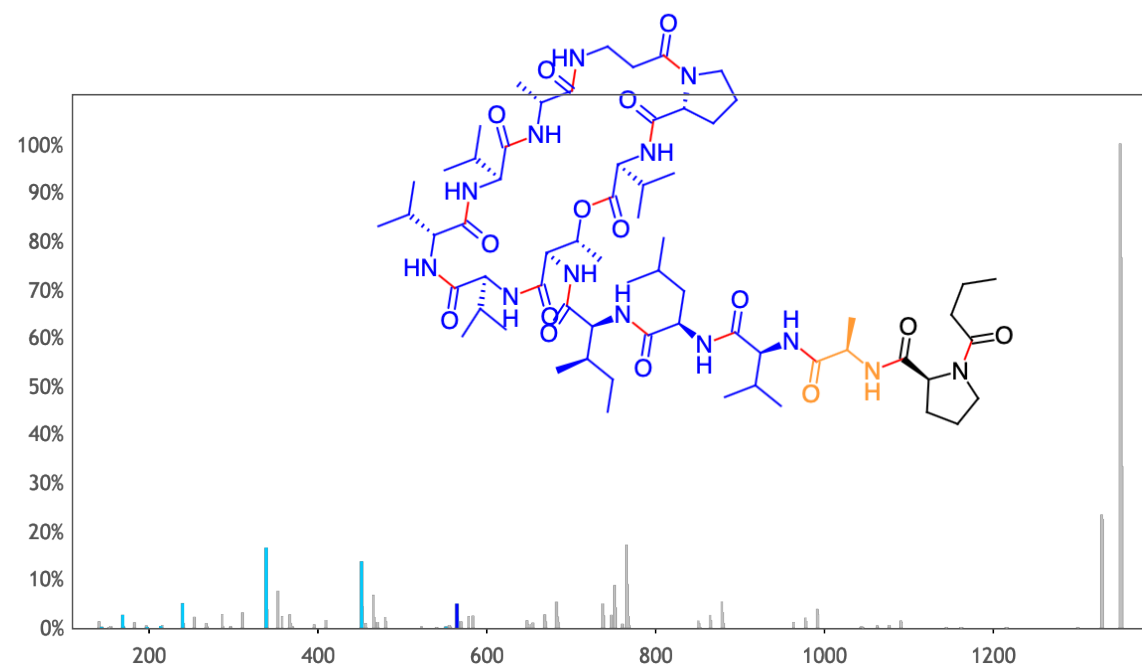**(f)**Cluster index **9309**    Modification: **C6H11NO - 14.017 Da = 99.067 Da**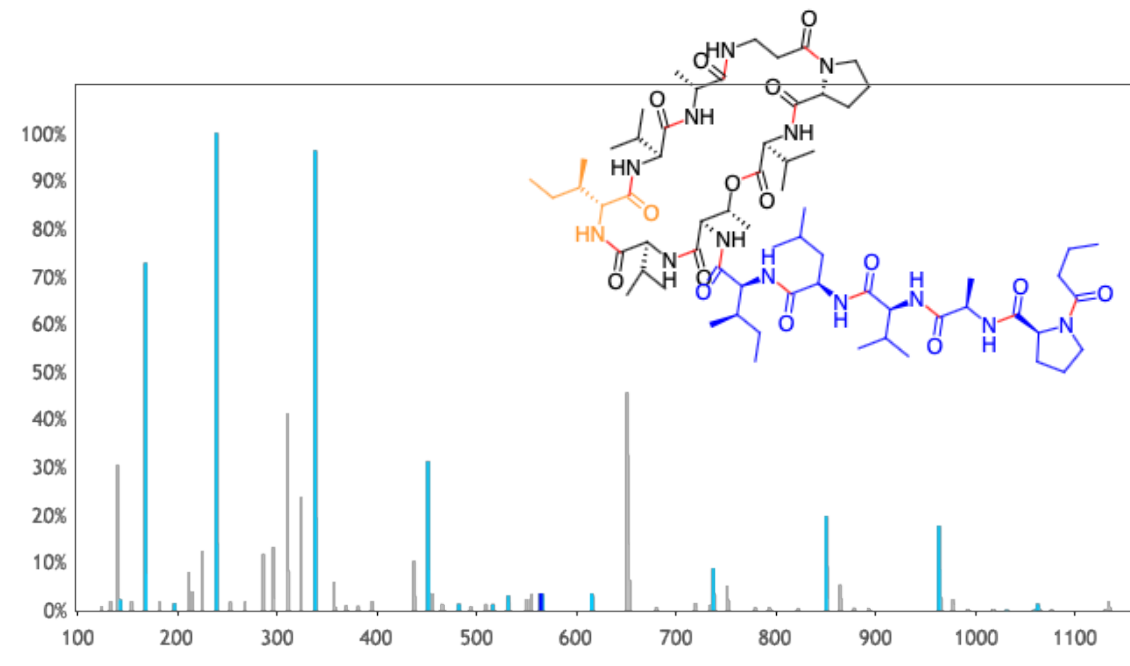

Supplement: s1 [file s1]
