# Supplementary material for: MolNetEnhancer: Enhanced Molecular Networks by Integrating Metabolome Mining and Annotation Tools
Source: MDPI journal article supplement (doi:10.3390/metabo9070144), 2019-07-16
Supplement: s1 [file s1]

(a)

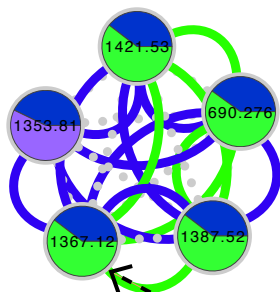

**[M+H]<sup>+</sup>  
GNPS library**

(b)

**MS2LDA  
substructure  
discovery**

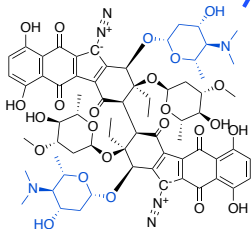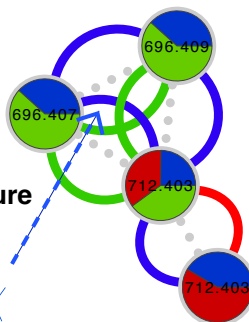

(c)

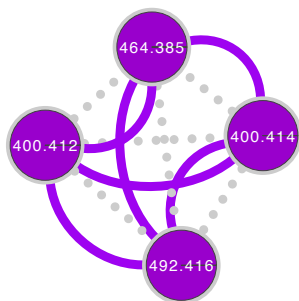

(d)

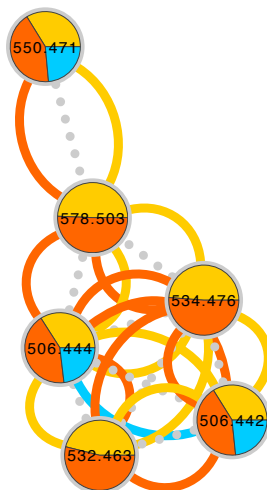

- **M2M\_285**  
Aminosugar related
- **M2M\_283**
- **M2M\_183**
- **M2M\_276**
- **M2M\_66**
- **M2M\_35**  
Unknown fragment-based
- **M2M\_250**  
Unknown loss-based
- **M2M\_261**  
Unknown loss-based
- **M2M\_256**

● ● ● ● cosine
