# Supplementary figures and images for: MolNetEnhancer: Enhanced Molecular Networks by Integrating Metabolome Mining and Annotation Tools
Source: MDPI journal article supplement (doi:10.3390/metabo9070144), 2019-07-16

(a)

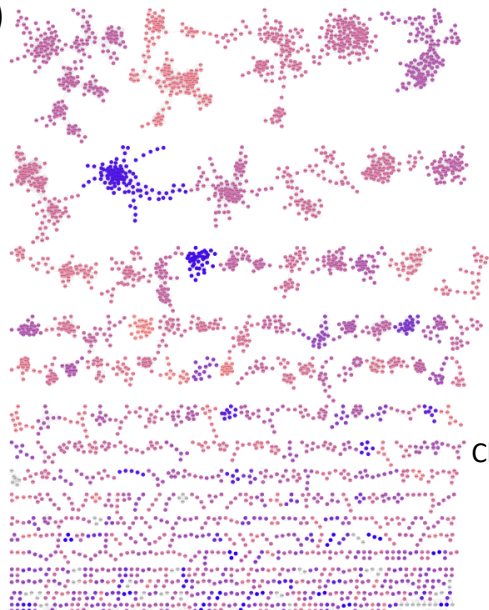

Chemical classification score

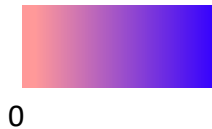

(b)

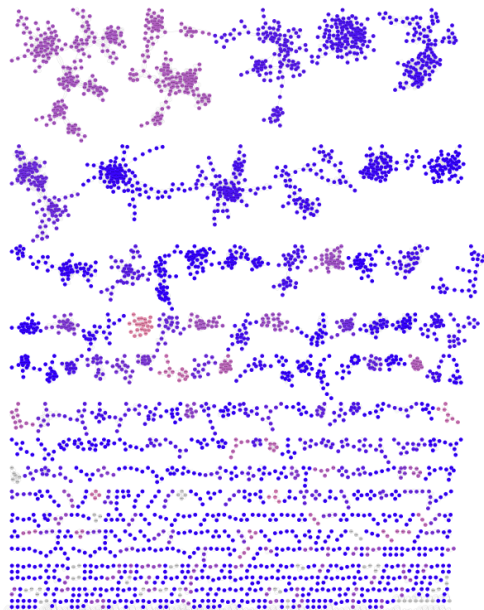

Supplement: s1 [file s1]

**(a)**

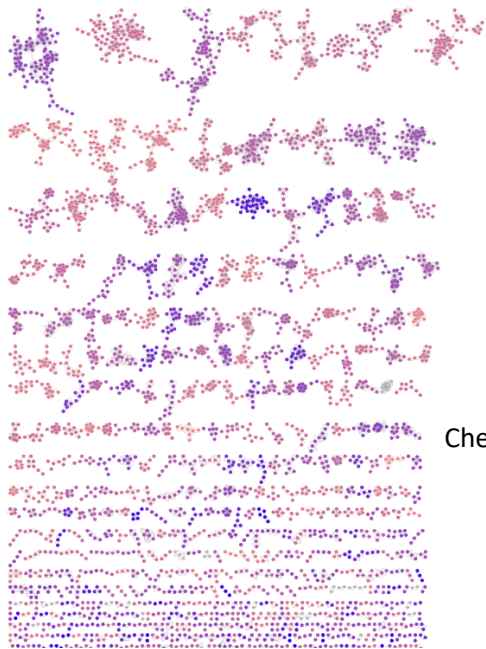

**(b)**

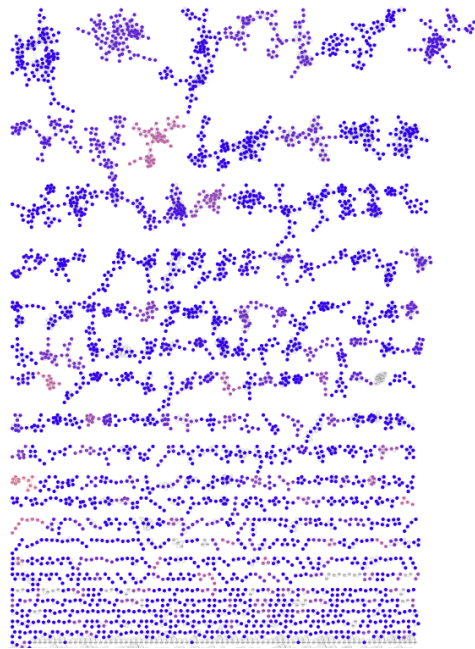

Chemical classification score

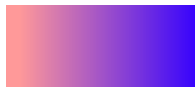

0

1

Supplement: s1 [file s1]

Intensity

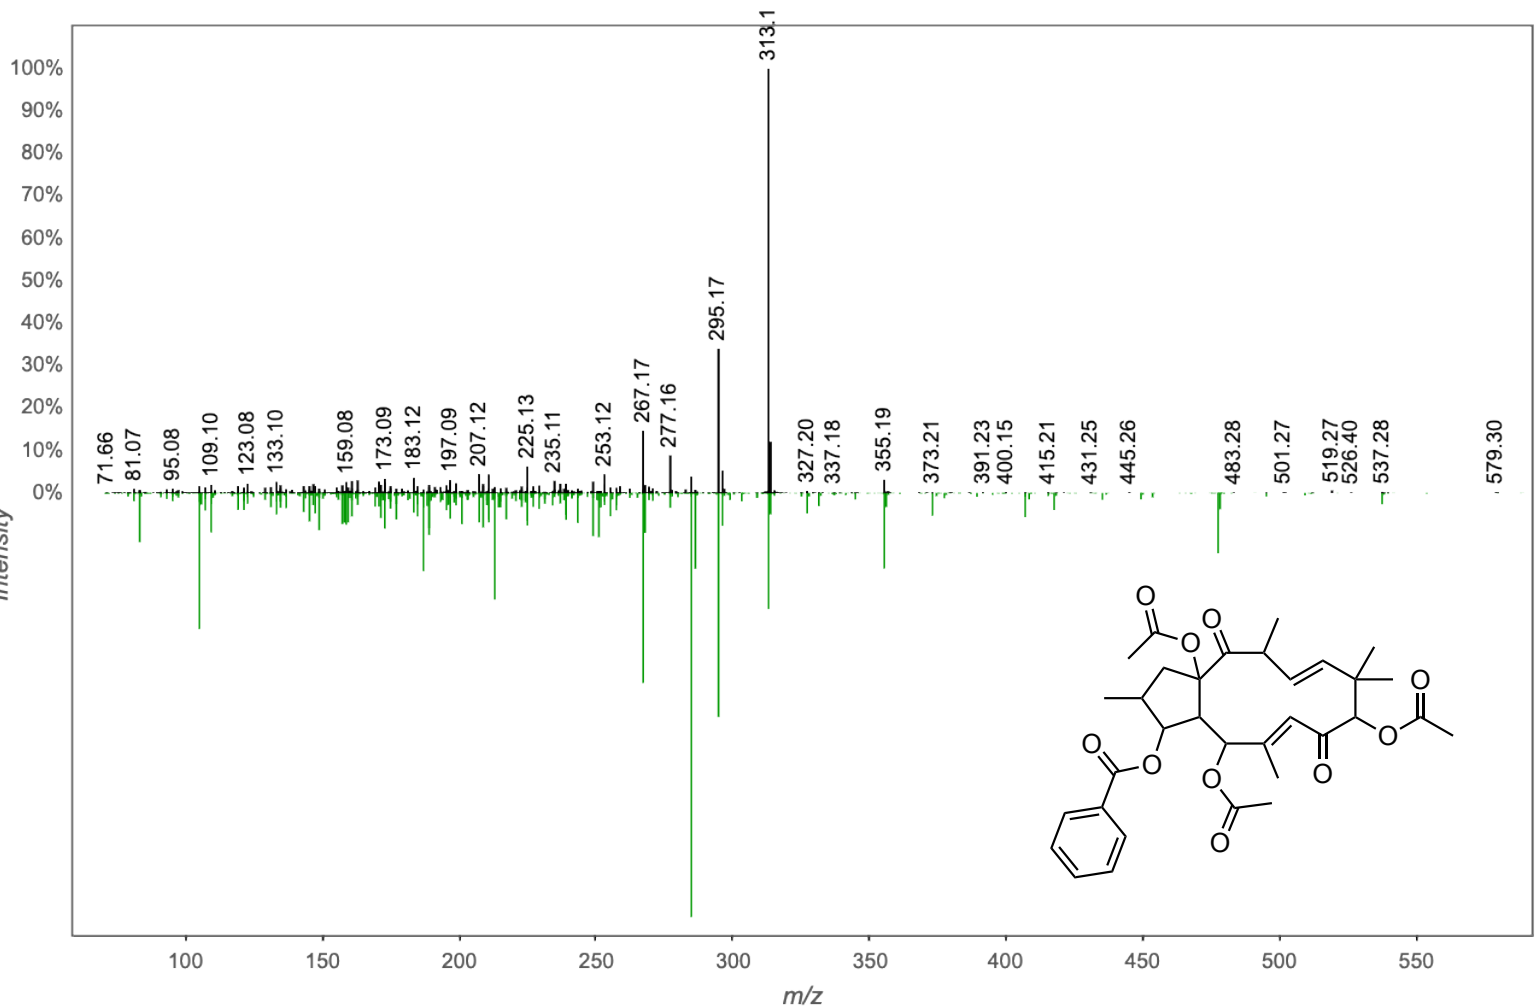

Supplement: s1 [file s1]
